# Supplementary material for: Improving regional medical laboratory center report quality through a report recall management system
Source: publisher site journal article supplement (doi:10.1515/cclm-2023-0786), 2023-09-06
Supplement: Supplementary file 1 [file j_cclm-2023-0786_suppl_001.docx]

Supplementary materials

Improving medical report quality through regional laboratory center report recall management system

Chuang Zhang, Xiang Ji, Jiehong Wei, Xiaowen Dou, Dayang Chen*, Xiuming Zhang*

Supplemental Table S1 Survey Questionnaire for Laboratory Report Recall Reasons

1. Please select your specialty labs (or divisions)

| □ Lab Division I | □ Lab Division II | □ Lab Division III |
| --- | --- | --- |
| □ Clinical Microbiome Lab | □ Clinical Immunity Lab | □ Molecular Diagnostic Lab |
| □ Mass Spectra Lab | □ Cytogenetic Lab |  |
| □ Clinical Routine and Biochemical Lab | |  |

2. Ranking the reasons for laboratory report recall according to importance in accordance with your work experience (The smaller the number, the higher the importance)

| Report results incorrect |  | Audit results not verified |  |
| --- | --- | --- | --- |
| Manual project result input error |  | Report information error |  |
| Unsuitable samples |  | Results verification |  |
| Error in experimental operation |  | Lis crashes or freezes |  |
| Report lacks essential remarks |  | Incomplete reporting information |  |
| Misalignment of sample numbers |  | Cancellation of laboratory item |  |
| The examiner is the same as the verifier |  | Abnormal charges |  |
| Instrument failure |  | Misuse of another person's account |  |
| Renew medical orders |  | Absence of quality control |  |
| Remove items not prescribed by the physician | | |  |

3. Please select and provide your revised descriptions for the inappropriate statements in the following laboratory result recall reasons

| Report results incorrect |  |  |
| --- | --- | --- |
| Audit results not verified |  |  |
| Manual project result input error |  |  |
| Report information error |  |  |
| Unsuitable samples |  |  |
| Results verification |  |  |
| Error in experimental operation |  |  |
| Remove items not prescribed by the physician |  |  |
| Lis crashes or freezes |  |  |
| Report lacks essential remarks |  |  |
| Incomplete reporting information |  |  |
| Misalignment of sample numbers |  |  |
| Cancellation of laboratory item |  |  |
| The examiner is the same as the verifier |  |  |
| Abnormal charges |  |  |
| Instrument failure |  |  |
| Misuse of another person's account |  |  |
| Renew medical orders |  |  |
| Absence of quality control |  |  |

4. Please fill in the blanks below with reasons for laboratory report recalls that are commonly used but not included in our coverage

|  |
| --- |

Supplemental Table S2 Continuous improvement process for the laboratory report error ratio of the Mass Spectra Lab

| ***Laboratory** | Mass Spectra Lab | ***Quality objectives for continuous improvement** | Laboratory report error ratio |
| --- | --- | --- | --- |
| **Continuously improve source analysis** | On August 5, 2022, during the statistical analysis of the laboratory report error rate within the group, the team leader of clinical mass spectrometry found that the indicator was 5% this month, which did not meet the quality target of ≤1% and needed continuous improvement. | | |
| **Attachment** |  | | |
| ***Assayer** | XiangJi（4384） | ***Date** | 2022-08-05 |

| **Process measures for continuous improvement** | After analyzing the cause, it was found that there was a problem of missing information of the submitting doctor in the report of spot checks, and the same problem was found when reviewing the information of other specimens of the patient. It was learned in communication with the information engineer that when the information of the doctor who ordered the test was not entered into the system, there would be a situation of no submitting doctor's information (such as new doctors, The information has not been fully entered into the system), In response to this problem, the clinical mass spectrometry lab asked the information engineers to add the function of reminding the auditor if the information of the specimen is missing during the first review. | | |
| --- | --- | --- | --- |
| **Attachment** |  | | |
| ***Department head** | XiangJi（4384） | ***Date** | 2022-08-05 |

| **Approval opinions and follow-up verification period** | Agree to the improvement measures, please follow up and verify within 30 days. | | |
| --- | --- | --- | --- |
| ***Signature** | LijunZhang（1366） | ***Date** | 2022-08-06 |

| **Implementation of continuous improvement measures** | After tracking and verifying the continuous improvement, it was found that the necessary information such as patient name, patient type, registration number, hospital, specimen status, age, specimen type, gender, submitting department, submitting doctor, application, sampling, sample acceptance and report sending time, and the names of laboratory technicians and second examiners could not be reflected in the inspection report. In the event of missing information, the Lis system prevents the report from being reviewed and sent. The incidence of missing test information was significantly reduced. | | |
| --- | --- | --- | --- |
| **Attachment** | 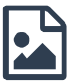 Tracking verification details | | |
| ***QC supervisor** | XiangJi（4384） | ***Date** | 2022-08-08 |

| **Evaluate the situation and conclusions** | Continuous improvement is effective, agree to close the process | | |
| --- | --- | --- | --- |
| ***Signature** | LijunZhang（1366） | ***Date** | 2022-08-26 |
